# Supplementary material for: Self-optimizing Bayesian for continuous flow synthesis process
Source: Royal Society of Chemistry journal article supplement (doi:10.1039/d4dd00223g), 2024-01-01
Supplement: d4dd00223g1.pdf [file d4dd00223g1.pdf]

## Supporting Information for:

# Self-Optimizing Bayesian for Continuous Flow Synthesis Process

Runzhe Liu,<sup>a</sup> Zihao Wang,<sup>b</sup> Wenbo Yang,<sup>a\*</sup> Jinzhe Cao,<sup>a\*</sup> and Shengyang Tao<sup>a\*</sup>

<sup>a</sup> School of Chemistry, State Key Laboratory of Fine Chemicals, Frontier Science Center for Smart Materials, Dalian Key Laboratory of Intelligent Chemistry, Dalian University of Technology, Dalian 116024, China.

Email: wbyang@dlut.edu.cn (W.Y.)

Email: ginercao@mail.dlut.edu.cn (J.C.)

Email: taosy@dlut.edu.cn (S.T.)

<sup>b</sup> Faculty of Information, Beijing University of Technology, Beijing 100124, China.

# Index

|                                                                                               |    |
|-----------------------------------------------------------------------------------------------|----|
| <b>Figure S1. Schematic diagram of piping connections for continuous flow reactions</b> ..... | S1 |
| <b>Table S1. 14 Sets of Prior Data for Optimization Data Table</b> .....                      | S2 |
| <b>Table S2. 5 Sets of Prior Data for Optimization Data Table</b> .....                       | S3 |
| <b>Table S3. Table of Optimized Model Parameters for 14 Sets of Prior Data</b> .....          | S4 |
| <b>Table S4. Table of Optimized Model Parameters for 5 Sets of Prior Data</b> .....           | S5 |
| <b>Computerized benchmarking of algorithms (Figure S2-S9, Table S5-S11)</b> .....             | S6 |

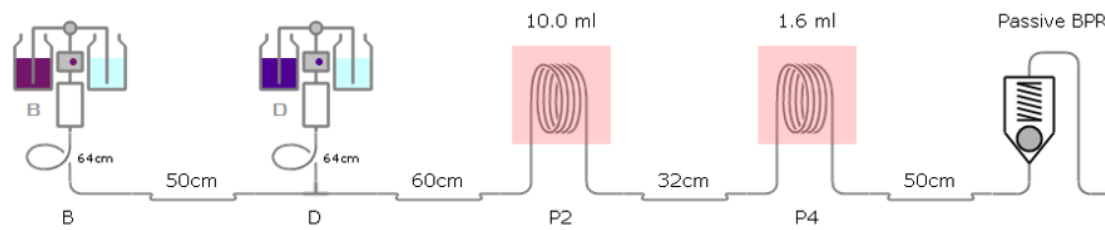

**Figure S1.** Schematic diagram of piping connections for continuous flow reactions with the Vapoutec R-Series Flow Synthesizer

**Table S1. 14 Sets of Prior Data for Optimization Data Table**

| Exp # | Time / min | Tem / °C | Anisamide / eq. | Base / eq. | Ligand / mol% | Actual Yield / % | Predicted Yield / % |
|-------|------------|----------|-----------------|------------|---------------|------------------|---------------------|
| 1     | 43         | 132      | 1.8             | 1.8        | 7.5           | 42.8             | non                 |
| 2     | 30         | 90       | 1.0             | 1.0        | 6.0           | 28.8             | non                 |
| 3     | 60         | 120      | 1.4             | 1.5        | 8.0           | 52.2             | non                 |
| 4     | 20         | 145      | 1.0             | 1.3        | 10.0          | 32.8             | non                 |
| 5     | 10         | 145      | 1.0             | 1.3        | 12.0          | 37.6             | non                 |
| 6     | 13         | 120      | 1.1             | 1.0        | 10.3          | 19.2             | non                 |
| 7     | 14         | 139      | 1.0             | 1.2        | 10.4          | 32.6             | non                 |
| 8     | 15         | 142      | 1.0             | 1.3        | 14.3          | 37.2             | non                 |
| 9     | 18         | 144      | 1.1             | 1.3        | 14.7          | 43.0             | non                 |
| 10    | 19         | 145      | 1.1             | 1.3        | 14.9          | 41.0             | non                 |
| 11    | 40         | 145      | 1.1             | 1.3        | 15.0          | 48.6             | non                 |
| 12    | 15         | 145      | 1.3             | 1.3        | 17.5          | 46.2             | non                 |
| 13    | 33         | 145      | 1.4             | 1.3        | 15.0          | 51.8             | non                 |
| 14    | 40         | 145      | 2.0             | 1.3        | 20.0          | 56.8             | non                 |
| 15    | 80         | 148      | 10.             | 2.9        | 19.9          | 71.6             | 111.6               |
| 16    | 80         | 148      | 1.9             | 1.0        | 19.9          | 62.8             | 80.2                |
| 17    | 80         | 148      | 1.9             | 2.9        | 6.0           | 45.4             | 88.2                |
| 18    | 80         | 148      | 1.0             | 2.9        | 19.9          | 65.5             | 72.2                |
| 19    | 80         | 148      | 1.0             | 2.9        | 19.9          | 63.6             | 69.0                |
| 20    | 80         | 41       | 1.3             | 2.7        | 19.9          | 24.6             | 70.6                |
| 21    | 80         | 148      | 1.0             | 1.0        | 19.3          | 57.8             | 73.6                |
| 22    | 80         | 148      | 1.9             | 1.0        | 19.9          | 63.3             | 68.0                |
| 23    | 80         | 148      | 1.0             | 1.0        | 19.7          | 57.8             | 65.5                |
| 24    | 78         | 147      | 1.9             | 2.6        | 19.9          | 68.1             | 66.5                |
| 25    | 80         | 148      | 1.9             | 2.9        | 6.3           | 50.0             | 76.6                |
| 26    | 80         | 148      | 1.9             | 2.9        | 19.9          | 79.1             | 67.4                |
| 27    | 80         | 148      | 1.9             | 2.9        | 19.9          | 74.9             | 70.3                |
| 28    | 80         | 148      | 1.9             | 2.9        | 19.9          | 79.3             | 70.4                |
| 29    | 80         | 148      | 1.9             | 2.9        | 19.9          | 79.1             | 70.2                |

---

**Table S2. 5 Sets of Prior Data for Optimization Data Table**

| Exp # | Time / min | Tem / °C | Anisamide / eq. | Base / eq. | Ligand / mol% | Actual yield / % | Predicted Yield / % |
|-------|------------|----------|-----------------|------------|---------------|------------------|---------------------|
| 1     | 10         | 145      | 1.0             | 1.3        | 12.0          | 37.6             | non                 |
| 2     | 13         | 120      | 1.1             | 1.0        | 10.3          | 19.2             | non                 |
| 3     | 14         | 139      | 1.0             | 1.2        | 10.4          | 32.6             | non                 |
| 4     | 15         | 142      | 1.0             | 1.3        | 14.3          | 37.2             | non                 |
| 5     | 15         | 145      | 1.3             | 1.3        | 17.5          | 46.2             | non                 |
| 6     | 2          | 30       | 1.9             | 1.0        | 19.9          | 21.2             | 366.4               |
| 7     | 2          | 148      | 1.0             | 2.9        | 19.9          | 42.2             | 148.0               |
| 8     | 80         | 148      | 1.9             | 2.9        | 19.9          | 74.2             | 127.1               |
| 9     | 80         | 148      | 1.9             | 2.9        | 19.9          | 80.6             | 74.1                |
| 10    | 80         | 148      | 1.9             | 1.0        | 19.9          | 62.8             | 80.9                |
| 11    | 2          | 148      | 1.9             | 2.9        | 19.9          | 43.0             | 77.1                |
| 12    | 80         | 148      | 1.0             | 2.9        | 19.9          | 63.4             | 76.4                |
| 13    | 80         | 148      | 1.9             | 1.0        | 19.9          | 63.3             | 78.9                |
| 14    | 80         | 148      | 1.0             | 2.9        | 19.9          | 65.5             | 77.1                |
| 15    | 80         | 148      | 1.9             | 2.9        | 19.9          | 79.7             | 73.7                |
| 16    | 80         | 148      | 1.9             | 2.9        | 19.9          | 78.1             | 75.4                |
| 17    | 80         | 148      | 1.9             | 2.9        | 6.0           | 45.4             | 77.7                |
| 18    | 80         | 148      | 1.9             | 2.9        | 19.9          | 79.1             | 72.9                |
| 19    | 80         | 148      | 1.9             | 2.9        | 19.9          | 74.9             | 73.6                |
| 20    | 80         | 148      | 1.9             | 2.9        | 19.9          | 79.3             | 74.2                |
| 21    | 80         | 148      | 1.9             | 2.9        | 19.9          | 79.1             | 74.1                |

---

---

**Table S3. Table of Optimized Model Parameters for 14 Sets of Prior Data**

---

| Exp# | Best Kernel                               | MSE    | Best Byperparameters                                                           |
|------|-------------------------------------------|--------|--------------------------------------------------------------------------------|
| 15   | DotProduct(sigma_0=1)                     | 3.186  | OrderedDict([('alpha',0.0066360850776123375),('n_restarts_optimizer', 16)])    |
| 16   | Matern(length_scale=1, nu=1.5)            | 5.288  | OrderedDict([('alpha',0.0066360850776123375),('n_restarts_optimizer', 16)])    |
| 17   | RationalQuadratic(alpha=1,length_scale=1) | 17.803 | OrderedDict([('alpha', 0.0066360850776123375), ('n_restarts_optimizer', 16)])  |
| 18   | RationalQuadratic(alpha=1,length_scale=1) | 15.904 | OrderedDict([('alpha', 1.0340016434251914e-06), ('n_restarts_optimizer', 17)]) |
| 19   | RationalQuadratic(alpha=1,length_scale=1) | 13.615 | OrderedDict([('alpha', 0.0066360850776123375), ('n_restarts_optimizer', 16)])  |
| 20   | RBF(length_scale=1)                       | 18.923 | OrderedDict([('alpha', 0.0066360850776123375), ('n_restarts_optimizer', 16)])  |
| 21   | Matern(length_scale=1, nu=1.5)            | 1.067  | OrderedDict([('alpha', 0.0066360850776123375), ('n_restarts_optimizer', 16)])  |
| 22   | Matern(length_scale=1, nu=1.5)            | 4.538  | OrderedDict([('alpha', 0.0066360850776123375), ('n_restarts_optimizer', 16)])  |
| 23   | Matern(length_scale=1, nu=1.5)            | 22.253 | OrderedDict([('alpha', 0.0066360850776123375), ('n_restarts_optimizer', 16)])  |
| 24   | RationalQuadratic(alpha=1,length_scale=1) | 0.386  | OrderedDict([('alpha', 0.0066360850776123375), ('n_restarts_optimizer', 16)])  |
| 25   | RationalQuadratic(alpha=1,length_scale=1) | 3.364  | OrderedDict([('alpha', 0.0066360850776123375), ('n_restarts_optimizer', 16)])  |
| 26   | RationalQuadratic(alpha=1,length_scale=1) | 9.107  | OrderedDict([('alpha', 0.0066360850776123375), ('n_restarts_optimizer', 16)])  |
| 27   | RationalQuadratic(alpha=1,length_scale=1) | 9.474  | OrderedDict([('alpha', 0.0066360850776123375), ('n_restarts_optimizer', 16)])  |
| 28   | DotProduct(sigma_0=1)                     | 1.430  | OrderedDict([('alpha', 6.0163078295899284e-05), ('n_restarts_optimizer', 19)]) |
| 29   | Matern(length_scale=1, nu=1.5)            | 6.772  | OrderedDict([('alpha', 0.0066360850776123375), ('n_restarts_optimizer', 16)])  |

---

The table shows the MSE of the best kernel as well as the hyperparameters, e.g, the 15th set of experiments was calculated using the data from the previous 14 sets of experiments, where the best kernel was DotProduct (sigma\_0=1) with an MSE of 3.186 and the best hyperparameters were `OrderedDict([('alpha', 0.0066360850776123375), ('n_restarts_optimizer', 16)])`

**Table S4. Table of Optimized Model Parameters for 5 Sets of Prior Data**

| Exp# | Best Kernel                                | MSE    | Best Byperparameters                                                           |
|------|--------------------------------------------|--------|--------------------------------------------------------------------------------|
| 6    | RationalQuadratic(alpha=1, length_scale=1) | 97.922 | OrderedDict([('alpha', 0.0066360850776123375), ('n_restarts_optimizer', 16)])  |
| 7    | Matern(length_scale=1, nu=1.5)             | 9.713  | OrderedDict([('alpha', 0.0066360850776123375), ('n_restarts_optimizer', 16)])  |
| 8    | RationalQuadratic(alpha=1, length_scale=1) | 1.263  | OrderedDict([('alpha', 1.0340016434251914e-06), ('n_restarts_optimizer', 17)]) |
| 9    | Matern(length_scale=1, nu=1.5)             | 8.440  | OrderedDict([('alpha', 0.0066360850776123375), ('n_restarts_optimizer', 16)])  |
| 10   | RBF(length_scale=1)                        | 34.442 | OrderedDict([('alpha', 0.0066360850776123375), ('n_restarts_optimizer', 16)])  |
| 11   | RationalQuadratic(alpha=1, length_scale=1) | 40.960 | OrderedDict([('alpha', 1.0340016434251914e-06), ('n_restarts_optimizer', 17)]) |
| 12   | RationalQuadratic(alpha=1, length_scale=1) | 21.496 | OrderedDict([('alpha', 1.0340016434251914e-06), ('n_restarts_optimizer', 17)]) |
| 13   | Matern(length_scale=1, nu=1.5)             | 4.282  | OrderedDict([('alpha', 0.0066360850776123375), ('n_restarts_optimizer', 16)])  |
| 14   | RationalQuadratic(alpha=1, length_scale=1) | 30.208 | OrderedDict([('alpha', 4.3693399475103194e-05), ('n_restarts_optimizer', 16)]) |
| 15   | RationalQuadratic(alpha=1, length_scale=1) | 2.446  | OrderedDict([('alpha', 0.0066360850776123375), ('n_restarts_optimizer', 16)])  |
| 16   | RationalQuadratic(alpha=1, length_scale=1) | 2.442  | OrderedDict([('alpha', 0.0066360850776123375), ('n_restarts_optimizer', 16)])  |
| 17   | DotProduct(sigma_0=1)                      | 83.223 | OrderedDict([('alpha', 0.0066360850776123375), ('n_restarts_optimizer', 16)])  |
| 18   | DotProduct(sigma_0=1)                      | 35.948 | OrderedDict([('alpha', 0.0066360850776123375), ('n_restarts_optimizer', 16)])  |
| 19   | DotProduct(sigma_0=1)                      | 35.756 | OrderedDict([('alpha', 0.0001491462267977867), ('n_restarts_optimizer', 19)])  |
| 20   | RationalQuadratic(alpha=1, length_scale=1) | 35.631 | OrderedDict([('alpha', 1.0340016434251914e-06), ('n_restarts_optimizer', 17)]) |
| 21   | RationalQuadratic(alpha=1, length_scale=1) | 1.625  | OrderedDict([('alpha', 4.3693399475103194e-05), ('n_restarts_optimizer', 16)]) |

The table shows the MSE of the best kernel as well as the hyperparameters, e.g., the 6th set of experiments was calculated using the data from the previous 5 sets of experiments, where the best kernel was RationalQuadratic(alpha=1, length\_scale=1) with an MSE of 97.922 and the best hyperparameters were OrderedDict([('alpha', 0.0066360850776123375), ('n\_restarts\_optimizer', 16)])

---

## Computerized benchmarking of algorithms

Based on the Arrhenius equation, we have constructed a chemical reaction model for computational benchmarking of algorithms. In this section, we compare our designed SOBayesian algorithm with the Dragonfly algorithm. The testing was conducted on a model that optimizes the yield as a single objective, with reaction temperature and reaction time as independent variables. The model was constructed according to the following formula, and the yield was calculated using first-order reaction kinetics.

$$k = Ae^{\frac{-Ea}{RT}}$$

$$\text{Yield} = (1 - e^{-kt}) \times 100$$

Where  $k$  is the rate constant,  $A$  is the frequency factor,  $Ea$  is the activation energy,  $R$  is the ideal gas constant,  $T$  is the absolute temperature, and  $t$  is the reaction time. The full parameter space search range is set to (time: 10–120min, temperature: 25–75°C), and the quarter parameter space search range is (time: 10–65min, temperature: 25–50°C).

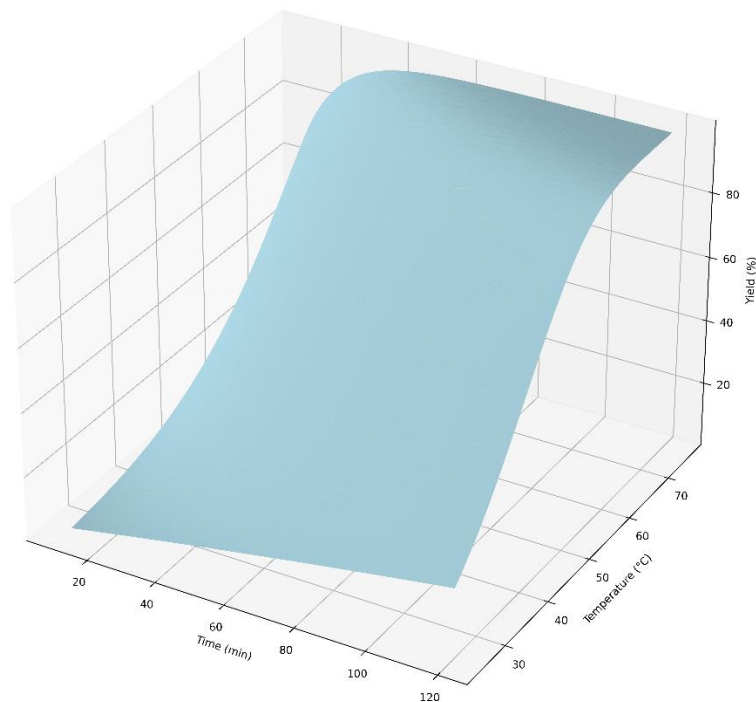

**Figure S2. Optimizing the full parameter space of a model**



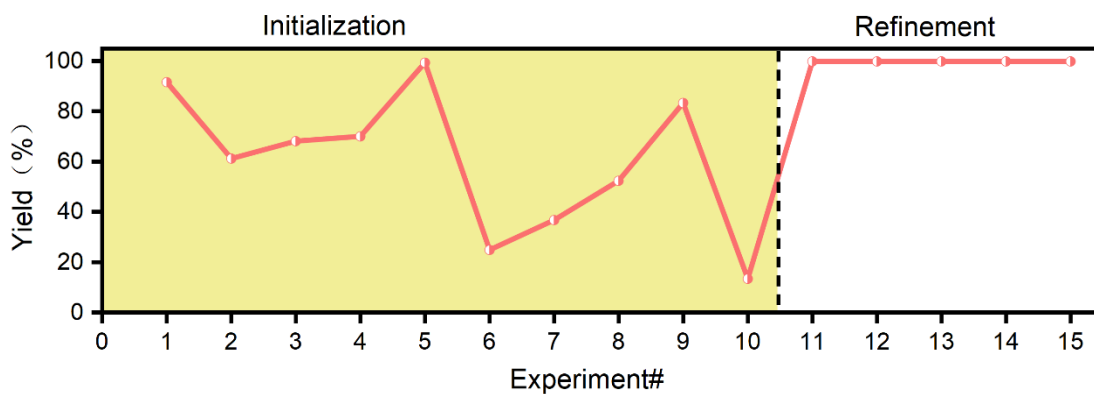

**Figure S3. Full-space random sampling using SOBAYesian**

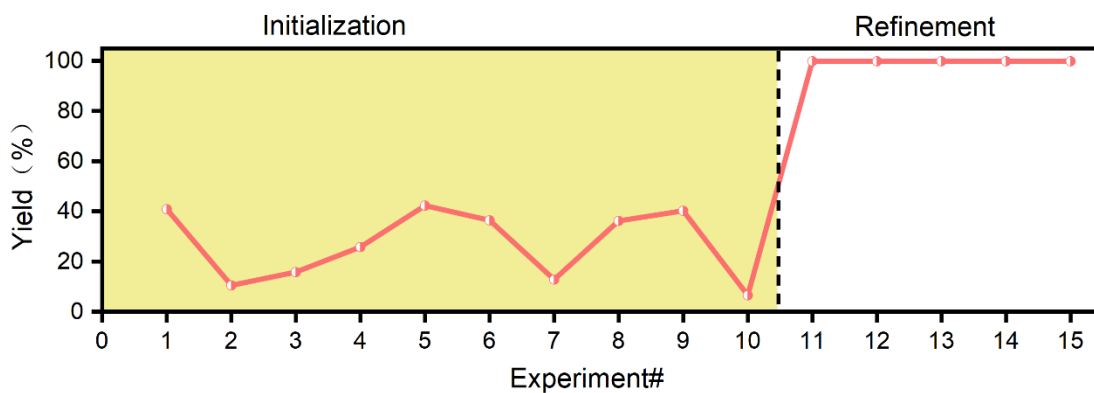

**Figure S4. Quarter-space random sampling using SOBAYesian**

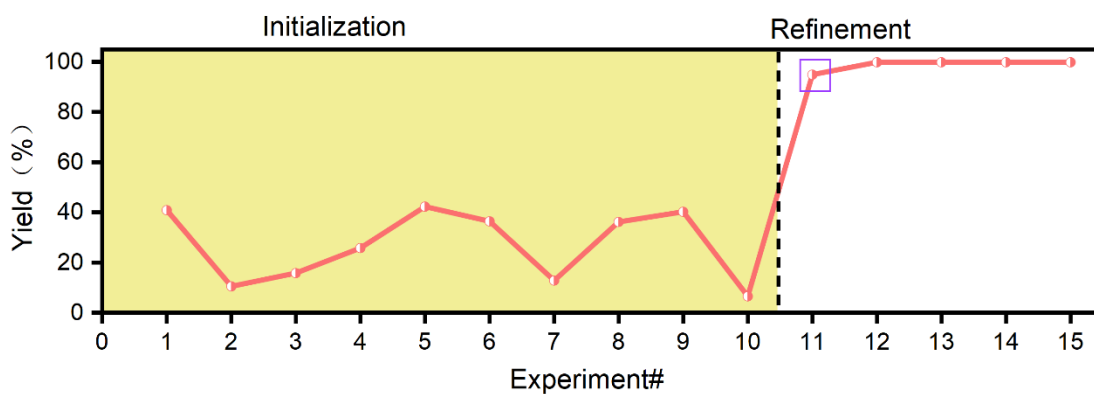

**Figure S5. Quarter-space random sampling using SOBAYesian (Includes error data)**

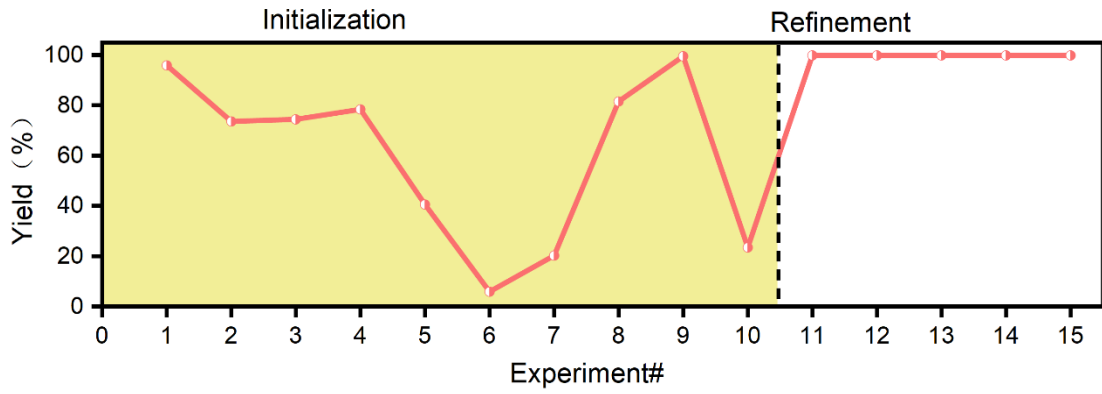

**Figure S6. Full-space Latin hypercube sampling using SOBAYesian**

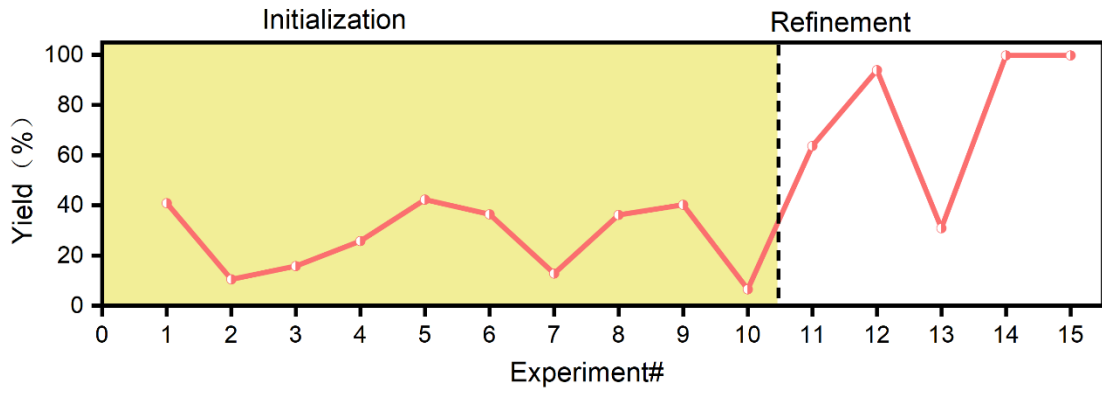

**Figure S7. Quarter-space random sampling using Dragonfly**

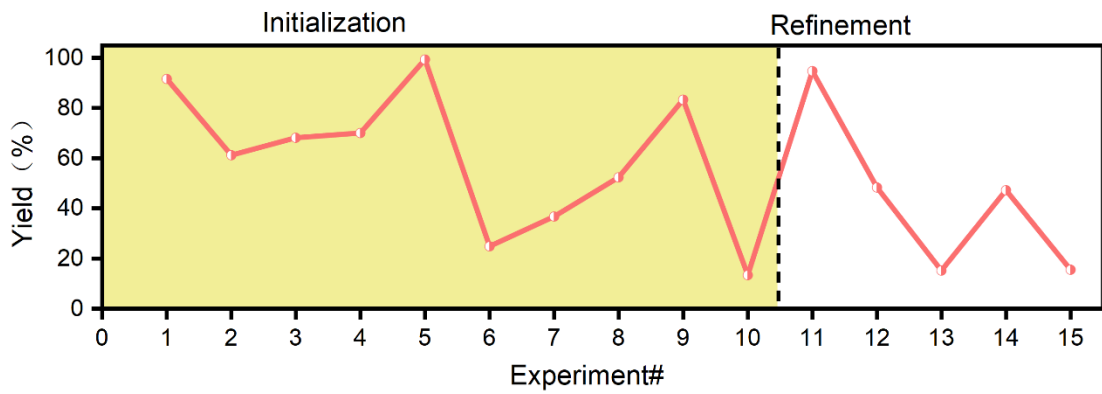

**Figure S8. Full-space random sampling using Dragonfly**

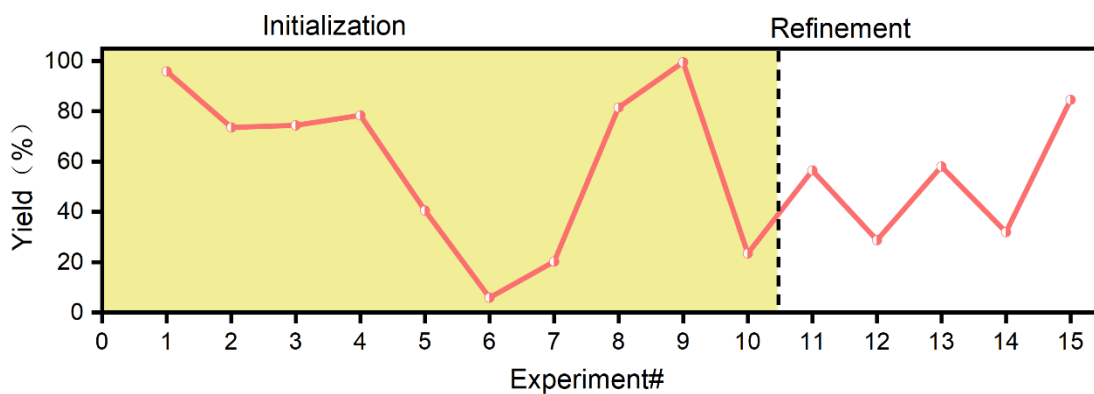

**Figure S9. Full-space Latin hypercube sampling using Dragonfly**

**Table S5. Full-space random sampling using SOBayesian optimized data**

| Exp# | Time (min) | Temperature (°C) | Yield (%) | predicted value |
|------|------------|------------------|-----------|-----------------|
| 1    | 112.22222  | 54.7979798       | 91.68316  |                 |
| 2    | 44.444444  | 54.29292929      | 61.30069  |                 |
| 3    | 20         | 68.43434343      | 68.27146  |                 |
| 4    | 85.555556  | 48.73737374      | 70.18882  |                 |
| 5    | 105.55556  | 66.41414141      | 99.49449  |                 |
| 6    | 18.888889  | 49.74747475      | 25.04631  |                 |
| 7    | 74.444444  | 38.13131313      | 36.8923   |                 |
| 8    | 94.444444  | 41.16161616      | 52.4791   |                 |
| 9    | 75.555556  | 55.80808081      | 83.49493  |                 |
| 10   | 27.777778  | 36.11111111      | 13.56466  |                 |
| 11   | 120        | 75               | 100       | 128.9           |
| 12   | 120        | 75               | 100       | 113.65          |
| 13   | 120        | 75               | 100       | 113.45          |
| 14   | 120        | 75               | 100       | 109.5           |
| 15   | 120        | 75               | 100       | 107.39          |

**Table S6. Quarter-space random sampling using SOBayesian optimized data**

| Exp# | Time (min) | Temperature (°C) | Yield (%) | predicted value |
|------|------------|------------------|-----------|-----------------|
| 1    | 36.666667  | 48.98989899      | 41.06085  |                 |
| 2    | 52.777778  | 25.50505051      | 10.67239  |                 |
| 3    | 61.111111  | 28.78787879      | 15.94564  |                 |
| 4    | 30         | 44.19191919      | 25.8952   |                 |
| 5    | 45.555556  | 46.71717172      | 42.46581  |                 |
| 6    | 48.333333  | 43.43434343      | 36.56735  |                 |
| 7    | 58.333333  | 26.76767677      | 13.00093  |                 |
| 8    | 34.444444  | 47.72727273      | 36.32587  |                 |
| 9    | 52.777778  | 43.93939394      | 40.36865  |                 |
| 10   | 16.666667  | 33.33333333      | 6.719041  |                 |
| 11   | 120        | 75               | 100       | 119.33          |
| 12   | 120        | 75               | 100       | 101.91          |
| 13   | 120        | 75               | 100       | 101.12          |
| 14   | 120        | 75               | 100       | 100.57          |
| 15   | 120        | 75               | 100       | 100.38          |

**Table S7. Quarter-space random sampling using SOBayesian optimized data(Includes error data)**

| Exp# | Time (min) | Temperature (°C) | Yield (%) | predicted value |
|------|------------|------------------|-----------|-----------------|
| 1    | 36.666667  | 48.98989899      | 41.06085  |                 |
| 2    | 52.777778  | 25.50505051      | 10.67239  |                 |
| 3    | 61.111111  | 28.78787879      | 15.94564  |                 |
| 4    | 30         | 44.19191919      | 25.8952   |                 |
| 5    | 45.555556  | 46.71717172      | 42.46581  |                 |
| 6    | 48.333333  | 43.43434343      | 36.56735  |                 |
| 7    | 58.333333  | 26.76767677      | 13.00093  |                 |
| 8    | 34.444444  | 47.72727273      | 36.32587  |                 |
| 9    | 52.777778  | 43.93939394      | 40.36865  |                 |
| 10   | 16.666667  | 33.33333333      | 6.719041  |                 |
| 11   | 120        | 75               | 95        | 119.33          |
| 12   | 120        | 75               | 100       | 97.35           |
| 13   | 120        | 75               | 100       | 101             |
| 14   | 120        | 75               | 100       | 98              |
| 15   | 120        | 75               | 100       | 98.5            |

**\*Red color is human input error data, the real value is 100**

**Table S8. Full-space Latin hypercube sampling using SOBayesian optimized data**

| Exp# | Time (min) | Temperature (°C) | Yield (%) | predicted value |
|------|------------|------------------|-----------|-----------------|
| 1    | 79.104833  | 63.39847226      | 96.01944  |                 |
| 2    | 47.012046  | 58.25865231      | 73.71803  |                 |
| 3    | 74.074571  | 52.31249795      | 74.54596  |                 |
| 4    | 111.7994   | 48.37339799      | 78.53282  |                 |
| 5    | 62.188869  | 41.97700279      | 40.69459  |                 |
| 6    | 16.085575  | 32.40808484      | 6.024781  |                 |
| 7    | 88.361538  | 27.6598472       | 20.3815   |                 |
| 8    | 24.903954  | 71.00778837      | 81.663    |                 |
| 9    | 101.26575  | 68.1683552       | 99.66862  |                 |
| 10   | 41.034061  | 38.86084161      | 23.59186  |                 |
| 11   | 119        | 75               | 100       | 137.42          |
| 12   | 120        | 75               | 100       | 113.7           |
| 13   | 120        | 75               | 100       | 117.38          |
| 14   | 120        | 75               | 100       | 112.24          |
| 15   | 120        | 75               | 100       | 109.46          |

**Table S9. Full-space random sampling using Dragonfly optimized data**

| Exp# | Time (min) | Temperature (°C) | Yield (%)   | predicted value |
|------|------------|------------------|-------------|-----------------|
| 1    | 54.79798   | 112.2222         | 91.68315779 |                 |
| 2    | 54.29293   | 44.44444         | 61.30068847 |                 |
| 3    | 68.43434   | 20               | 68.27145842 |                 |
| 4    | 48.73737   | 85.55556         | 70.18882037 |                 |
| 5    | 66.41414   | 105.5556         | 99.49448548 |                 |
| 6    | 49.74747   | 18.88889         | 25.04630696 |                 |
| 7    | 38.13131   | 74.44444         | 36.89229896 |                 |
| 8    | 41.16162   | 94.44444         | 52.4790997  |                 |
| 9    | 55.80808   | 75.55556         | 83.49492992 |                 |
| 10   | 36.11111   | 27.77778         | 13.56466235 |                 |
| 11   | 69.4208    | 48.4686          | 94.88       | 13.59078971     |
| 12   | 52.7814    | 34.64461         | 48.44       | 91.82506587     |
| 13   | 42.63544   | 18.82434         | 15.34       | 47.57556277     |
| 14   | 49.82325   | 41.84347         | 47.39       | 15.93938494     |
| 15   | 28.09313   | 63.66097         | 15.67       | 46.89615898     |

**Table S10. Quarter-space random sampling using Dragonfly optimized data**

| Exp# | Time (min) | Temperature (°C) | Yield (%)   | predicted value |
|------|------------|------------------|-------------|-----------------|
| 1    | 48.9899    | 36.66667         | 41.06085371 |                 |
| 2    | 25.50505   | 52.77778         | 10.67239167 |                 |
| 3    | 28.78788   | 61.11111         | 15.94564229 |                 |
| 4    | 44.19192   | 30               | 25.89519853 |                 |
| 5    | 46.71717   | 45.55556         | 42.46580546 |                 |
| 6    | 43.43434   | 48.33333         | 36.56735459 |                 |
| 7    | 26.76768   | 58.33333         | 13.00092791 |                 |
| 8    | 47.72727   | 34.44444         | 36.32587499 |                 |
| 9    | 43.93939   | 52.77778         | 40.36864628 |                 |
| 10   | 33.33333   | 16.66667         | 6.719041148 |                 |
| 11   | 50.88222   | 61.15377         | 63.8        | 98.63242936     |
| 12   | 56.64995   | 111.1941         | 94.02       | 61.98361048     |
| 13   | 41.74114   | 45.0976          | 31.06       | 93.34251994     |
| 14   | 74.49987   | 78.89305         | 99.88       | 30.77780044     |
| 15   | 72.77515   | 86.55885         | 99.87       | 99.48475163     |

**Table S11. Full-space Latin hypercube sampling using Dragonfly optimized data**

| Exp# | Time (min) | Temperature (°C) | Yield (%)   | predicted value |
|------|------------|------------------|-------------|-----------------|
| 1    | 63.39847   | 79.10483         | 96.01944277 |                 |
| 2    | 58.25865   | 47.01205         | 73.71803277 |                 |
| 3    | 52.3125    | 74.07457         | 74.54595961 |                 |
| 4    | 48.3734    | 111.7994         | 78.53282252 |                 |
| 5    | 41.977     | 62.18887         | 40.69458584 |                 |
| 6    | 32.40808   | 16.08557         | 6.024781104 |                 |
| 7    | 27.65985   | 88.36154         | 20.3815012  |                 |
| 8    | 71.00779   | 24.90395         | 81.66300029 |                 |
| 9    | 68.16836   | 101.2658         | 99.6686218  |                 |
| 10   | 38.86084   | 41.03406         | 23.5918594  |                 |
| 11   | 51.50317   | 48.04056         | 56.65       | 25.50481269     |
| 12   | 39.33475   | 50.02496         | 28.88       | 59.07126091     |
| 13   | 60.31874   | 26.51596         | 58.19       | 29.10699484     |
| 14   | 52.00571   | 21.48252         | 32.15       | 64.0154715      |
| 15   | 52.63696   | 99.25099         | 84.71       | 38.99264697     |
